# Supplementary material for: Combined inhibition of EGFR and c-ABL suppresses the growth of triple-negative breast cancer growth through inhibition of HOTAIR
Source: PubMed Central journal article supplement (PMC4484446; doi:10.18632/oncotarget.3441), 2015-03-10
Supplement: oncotarget-06-11150-s001.pdf [file oncotarget-06-11150-s001.pdf]

## SUPPLEMENTARY FIGURES AND TABLE

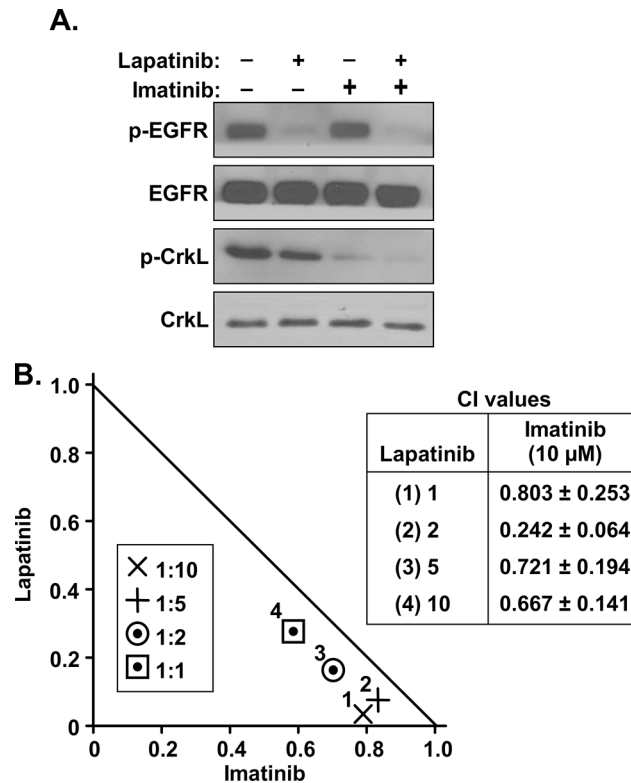

**Supplementary Figure S1: Synergistic growth suppression by lapatinib and imatinib combination.** (A) MDA-MB-231 cells were treated with lapatinib (10  $\mu$ M), imatinib (10  $\mu$ M), or both for 72 hours. Western analysis of total cell lysates showed that phospho-Y1068-EGFR and phospho-Y207-CrkL were inhibited by lapatinib and imatinib, respectively. (B) Isobologram based on dose-response curves for lapatinib and imatinib. Data points below the line represent synergistic drug interactions; points on the line indicate an additive interaction; points above the line indicate antagonism. The table shows the combination indexes (CI) of different doses of lapatinib with 10  $\mu$ M of imatinib derived from three independent experiments. A combination index (CI) value of one indicates an additive interaction; a CI value greater than one indicates antagonism; and a CI value less than one indicates synergism.

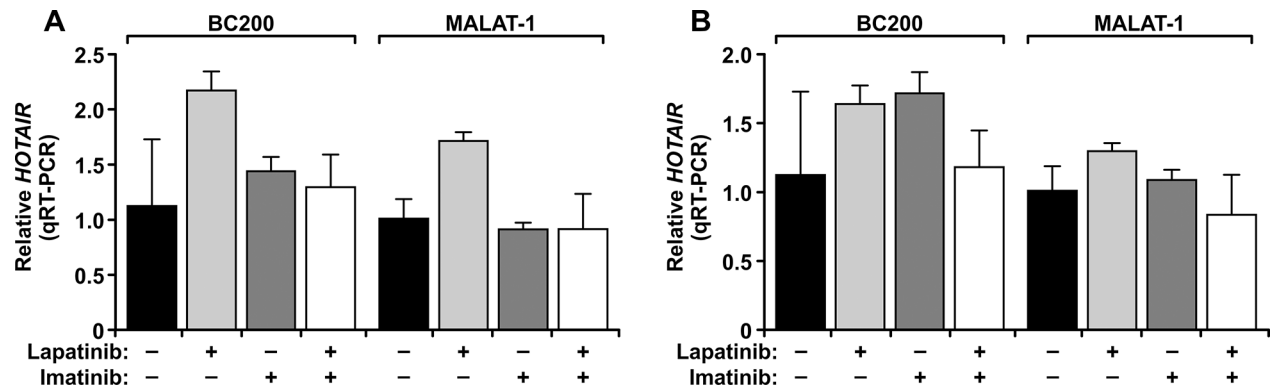

**Supplementary Figure S2: Expression of lncRNA BC200 and MALAT-1 does not respond to the dual treatment.** MDA-MB-231 (A) and SUM159 (B) cells were untreated or treated with lapatinib, imatinib, or lapatinib plus imatinib as indicated. The levels of BC200 and MALAT-1 were then determined by qRT-PCR and normalized with GAPDH and 18S. There is no significant statistic difference of RNA expression comparing the no treatment control and the dual treatment ( $P > 0.05$ ).

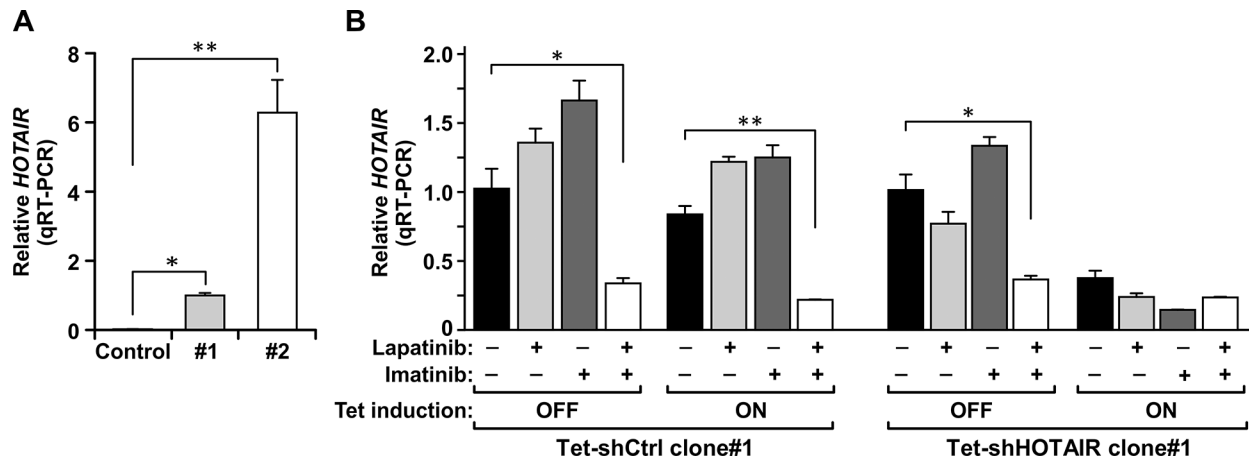

**Supplementary Figure S3: HOTAIR expression in Figures 2B and 2C measured by qRT-PCR.** (A) Relative HOTAIR expression in the stable clones of MDA-MB-231 used in Figure 2B. (B) Relative HOTAIR expression in the inducible clones used in Figure 2C. The qRT-PCR levels were normalized by 18S expression. \*,  $P < 0.05$ ; \*\*,  $P < 0.01$ .

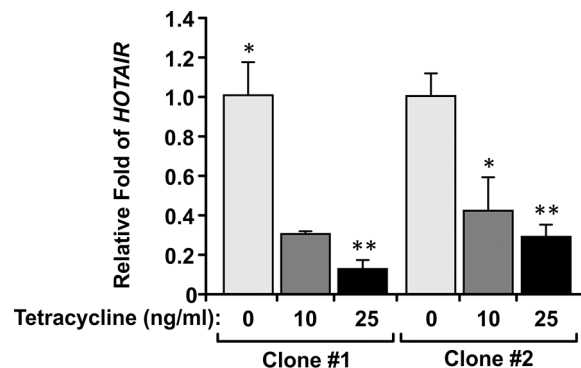

**Supplementary Figure S4: HOTAIR expression in inducible shHOTAIR transfectants.** MDA-MB-231 cells were engineered to expression shRNA of HOTAIR or the control shRNA of scrambled sequence under the control of the tetracycline-inducible promoter. Cells were induced by tetracycline of 10 ng/ml or 25 ng/ml for 96 hrs. The levels of HOTAIR were determined by qRT-PCR and normalized to 18S. \*,  $P < 0.05$ ; \*\*,  $P < 0.01$ .

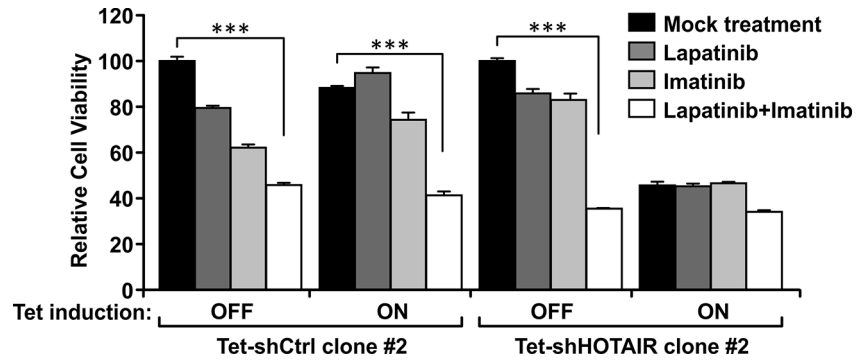

**Supplementary Figure S5: Dual treatment inhibits cell growth through targeting *HOTAIR*.** In addition to the clones shown in Figure 2C, an additional pair of MDA-MB-231-derived clones of tet-shHOTAIR and tet-shCtrl were induced by tetracycline for 96 hrs then treated with indicated drugs for 48 hrs. Viable cells were then measured by MTT assays. \*\*\*,  $P < 0.005$ .

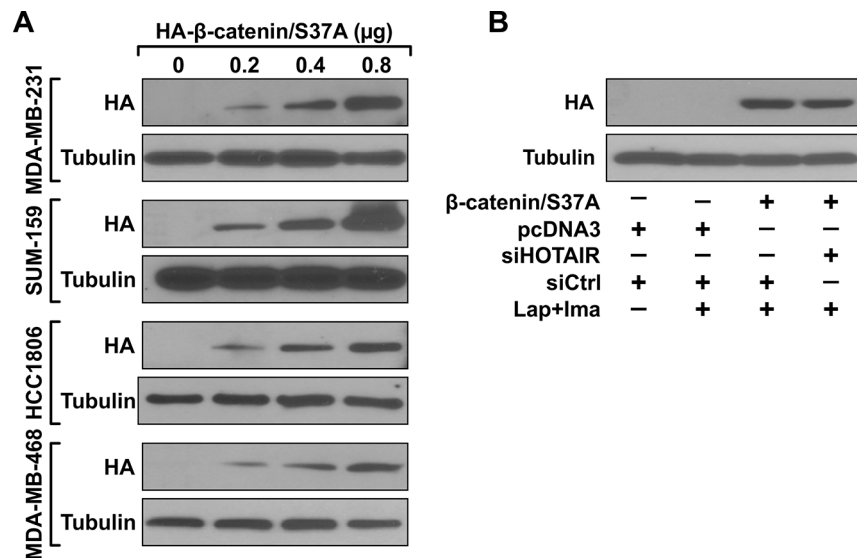

**Supplementary Figure S6: Verification of β-catenin expression.** (A) Expression of transfected HA-tagged β-catenin is determined by Western analysis using an anti-HA antibody for each indicated cell line treated separately but with the same conditions as described in Figure 3B. (B) Western analysis of HA-β-catenin expression in MDA-MB-231 cells treated separately but with the same conditions as described in Figure 3F.

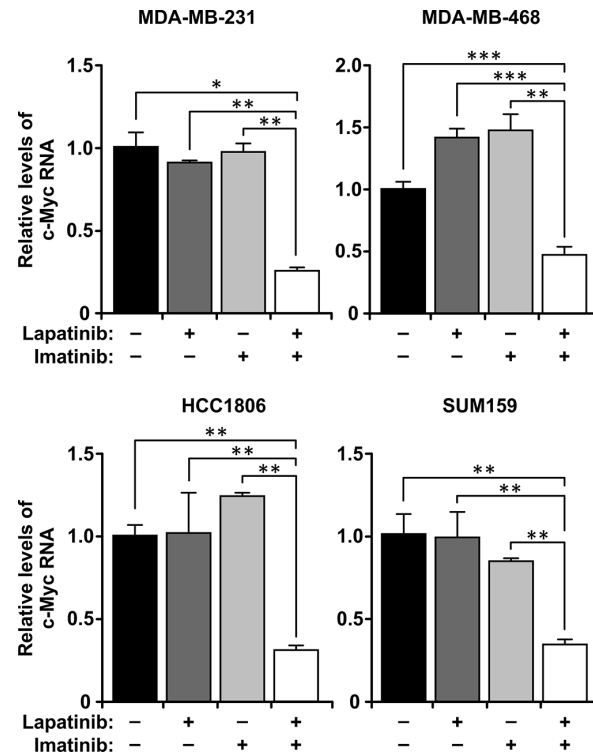

**Supplementary Figure S7: Dual treatment suppresses c-Myc expression.** MDA-MB-231 and MDA-MB-468 and SUM159 cells were mock treated, or treated with lapatinib alone (10  $\mu$ M), imatinib alone (10  $\mu$ M), or their combination for 48 hours. HCC1806 cells were mock treated or treated with lapatinib alone (5  $\mu$ M), imatinib alone (10  $\mu$ M), or their combination for 48 hours. The levels of c-Myc RNA were determined by qRT-PCR and normalized to 18S. \*,  $P < 0.05$ ; \*\*,  $P < 0.01$ ; \*\*\*,  $P < 0.001$ .

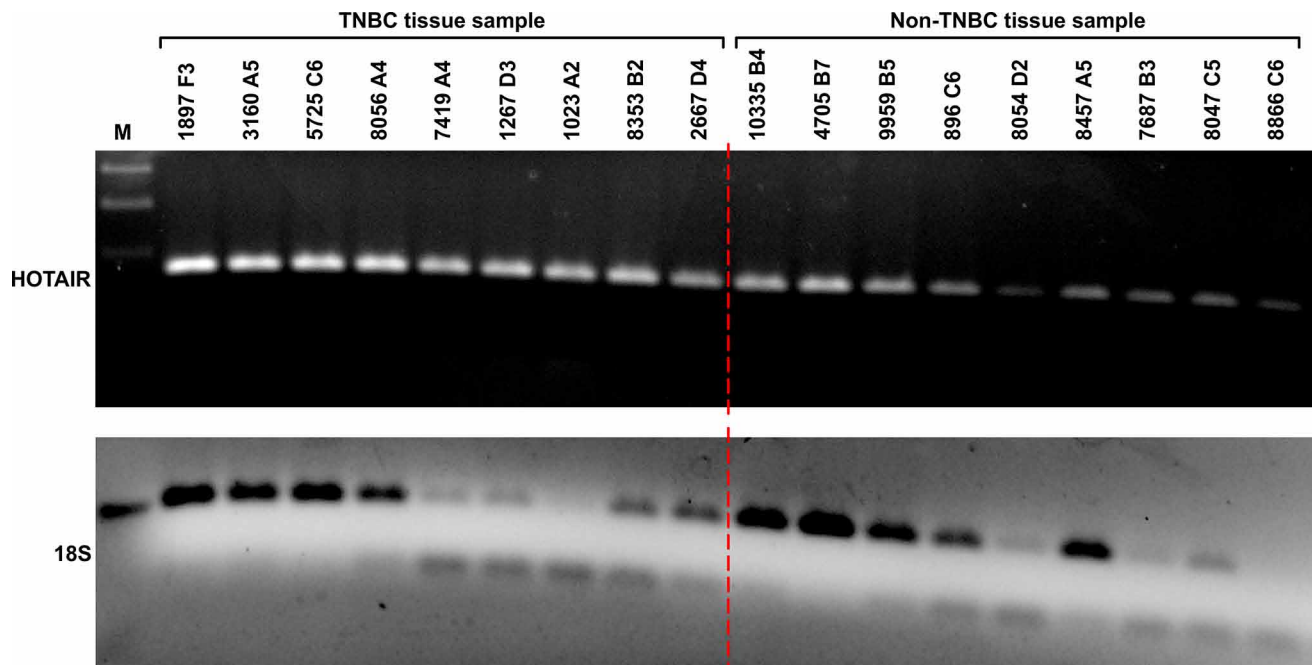

**Supplementary Figure S8: Expression of *HOTAIR* is associated with TNBC.** RNA samples from primary breast cancer tumor tissues of TNBC and non-TNBC were extracted following the instruction of the manufacturer (Zymo; Irvine, CA) and the levels of *HOTAIR* were determined by RT-PCR. 18S was shown as the input control.

Supplementary Table S1: Statistical analysis of Figure 1B

| Weeks | Ctl vs Dual  |            | Lap vs Dual  |           | Ima vs Dual  |            |
|-------|--------------|------------|--------------|-----------|--------------|------------|
|       | Significance | P value    | Significance | P value   | Significance | P value    |
| 1     | -            | 0.903099   | -            | 0.885183  | -            | 0.971655   |
| 4     | -            | 0.605719   | -            | 0.94504   | -            | 0.935906   |
| 7     | -            | 0.365714   | -            | 0.777454  | -            | 0.618999   |
| 10    | -            | 0.320924   | -            | 0.786416  | -            | 0.551658   |
| 14    | -            | 0.0721446  | -            | 0.47566   | -            | 0.368611   |
| 18    | *            | 0.0130629  | -            | 0.474232  | -            | 0.250883   |
| 24    | **           | 0.00950806 | -            | 0.231792  | -            | 0.0883949  |
| 27    | ***          | 0.00371837 | -            | 0.0624445 | *            | 0.0450856  |
| 30    | ***          | 0.00209735 | *            | 0.0439888 | ***          | 0.00210895 |
| 33    | ***          | 2.0618E-05 | *            | 0.0198929 | ***          | 6.7274E-05 |
| 37    | ***          | 3.1428E-11 | *            | 0.0161623 | ***          | 2.2679E-05 |

\*,  $P < 0.05$ \*\*,  $P < 0.01$ \*\*\*,  $P < 0.005$
